# Supplementary material
Source: publisher figshare collection journal article supplement (https://frontiersin.figshare.com/ndownloader/files/25001849)
Supplement: Supplementary file 1 [file 25001849]

## Supplementary Material

|                                |                     |
|--------------------------------|---------------------|
| <b>Interviewer code:</b> _____ | <b>#File:</b> _____ |
| <b>Date:</b> _____             | <b>Port:</b> _____  |

  

**INTRODUCTION**

My name is \_\_\_\_\_. I am studying the Peruvian artisanal fishery. This is a voluntary and anonymous interview survey, with scientific objectives. We don't need your name or other personal information and we will not share your personal answer with another person beyond the scientific team. You don't have to answer a question if you don't want to.

**FISHERY SECTION**

*First: I will ask about you. Be aware that the information will be seen as a global and confidence data.*

1. How old are you? \_\_\_\_\_ Gender \_\_\_\_\_
2. When did you start to fishing? \_\_\_\_\_
3. Are you the owner of the boat where you work? Yes \_\_\_\_\_ No \_\_\_\_\_
4. Which type of fishing gear do you use more? Can you enumerate in order of frequency?  
 Driftnets \_\_\_\_\_ Bottom net \_\_\_\_\_ Longlines \_\_\_\_\_

**The following questions will be answered in function of the fishery gear it used more.**

5. What do you capture with this fishing gear? \_\_\_\_\_
6. During which months do you use this fishing gear? \_\_\_\_\_
7. How many trips do you do in one month using this fishing gear? \_\_\_\_\_
8. Do you use bait with this fishing gear? \_\_\_\_\_ (If the answer is yes) which type of bait do you use? \_\_\_\_\_
9. Which bait works better? \_\_\_\_\_
10. In how many sets do you use bait? \_\_\_\_\_
11. Can you reuse the bait? \_\_\_\_\_
12. Mention some of your fishing areas \_\_\_\_\_

**CETACEANS SECTION**

*Now I will focus more on small cetaceans. All answers are for research, confidential and anonymous.*

13. Do you see dolphins or porpoise when you are fishing? Yes \_\_\_\_\_ No \_\_\_\_\_ No answer \_\_\_\_\_
14. **If the answer is Yes.** Which type? (use the leaflet, put it in order by frequency)  
 Bottlenose \_\_\_\_\_ Dusky \_\_\_\_\_ Common \_\_\_\_\_ Porpoise \_\_\_\_\_ Others \_\_\_\_\_ No answer \_\_\_\_\_
15. Do you think dolphins cause problems with your fishery? Yes \_\_\_\_\_ No \_\_\_\_\_ No answer \_\_\_\_\_  
 Explain the situation: \_\_\_\_\_
16. Have you ever captured dolphins? Yes \_\_\_\_\_ No \_\_\_\_\_ No answer \_\_\_\_\_
17. When you capture them, how many individuals do you capture *per trip*? \_\_\_\_\_
18. In which month do you capture more dolphins? \_\_\_\_\_
19. Is there a specie that is caught more often? (Use the brochure, put in order by frequency)  
 Bottlenose \_\_\_\_\_ Dusky \_\_\_\_\_ Common \_\_\_\_\_ Porpoise \_\_\_\_\_ Others \_\_\_\_\_ No answer \_\_\_\_\_
20. Most of the time are they caught alive or dead? Alive \_\_\_\_\_ Dead \_\_\_\_\_ No answer \_\_\_\_\_
21. What do you do with the animal if it is dead?  
 Throw away \_\_\_\_\_ Eaten \_\_\_\_\_ Used as Bait \_\_\_\_\_ Sale \_\_\_\_\_ All the previous options \_\_\_\_\_ No answer \_\_\_\_\_
22. What do you do with the animal if it is still alive?  
 Released \_\_\_\_\_ Eaten \_\_\_\_\_ Used as bait \_\_\_\_\_ Sale \_\_\_\_\_ All the previous options \_\_\_\_\_ No answer \_\_\_\_\_
23. If you answer "sale", how much does it cost? \_\_\_\_\_ for what do you sell/use it? \_\_\_\_\_  
 Where do you sell it? \_\_\_\_\_
24. If you answer "bait". Is there any dolphin that is preferred as a bait?  
 Bottlenose \_\_\_\_\_ Dusky \_\_\_\_\_ Common \_\_\_\_\_ Porpoise \_\_\_\_\_ Others \_\_\_\_\_ No answer \_\_\_\_\_
25. How many individuals do you use as bait *per trip*? \_\_\_\_\_

  

**GIVE AS YOUR OPINION IN THE FOLLOWING SENTENCES:**

26. Is the dolphin a type of fish? Yes \_\_\_\_\_ No \_\_\_\_\_ I don't know \_\_\_\_\_ No answer \_\_\_\_\_
27. Is it positive the presence of dolphins in the Peruvian ocean? (1 Completely agree- 5 Completely disagree)  
 1 \_\_\_\_\_ 2 \_\_\_\_\_ 3 \_\_\_\_\_ 4 \_\_\_\_\_ 5 \_\_\_\_\_ No answer \_\_\_\_\_
28. Is there any law that protects dolphins?  
 Yes \_\_\_\_\_ No \_\_\_\_\_ I don't know \_\_\_\_\_ No answer \_\_\_\_\_
29. If the answer is Yes, do you think these laws are respected in your port?  
 Yes \_\_\_\_\_ No \_\_\_\_\_ I don't know \_\_\_\_\_ No answer \_\_\_\_\_
30. What do you think is the penalty for not respecting the law?  
 I don't know \_\_\_\_\_ No answer \_\_\_\_\_
31. Who do you think should be the responsible for the conservation and protection for dolphins?  
 \_\_\_\_\_
32. Do you have any suggestion for avoiding the capture for dolphins in your fishing gear?  
 \_\_\_\_\_

  

**HISTORICAL QUESTIONS**

33. Do you know if they used to directly capture dolphins in this port? Yes \_\_\_\_\_ No \_\_\_\_\_ I don't know \_\_\_\_\_ No answer \_\_\_\_\_
34. **If the answer is Yes.** Is this still happening? Yes \_\_\_\_\_ No \_\_\_\_\_ I don't know \_\_\_\_\_ No answer \_\_\_\_\_
35. Comparing when you started to fish, the dolphin use as a bait is now...?  
 More \_\_\_\_\_ Less \_\_\_\_\_ Equal \_\_\_\_\_ I don't know \_\_\_\_\_ No answer \_\_\_\_\_
36. Comparing when you started to fish, the directly capture dolphins in number of individuals is:  
 More \_\_\_\_\_ Less \_\_\_\_\_ Equal \_\_\_\_\_ I don't know \_\_\_\_\_ No answer \_\_\_\_\_

→ We are grateful for your participation in this study, and we trust that it will help as too learn more about this subject (GIVE THE MAMMAL GUIDE)

  

**JUST FOR INTERVIEWER**

37. How honest do the fisherman when he was answering the questions about incidental fishery?  
☐ Very honest ☐ Partial honest ☐ Not honest at all
38. How sure do the fisherman seems when he was answering the numeric questions?  
☐ Very sure ☐ Rational sure ☐ Insecure
39. **Additional comments:** \_\_\_\_\_

**Supplementary Figure 1.** Survey translated from Spanish to English that was administered to fishers in four ports, Paita, Salaverry, Pucusana and Ilo.
